# Supplementary material
Source: PubMed Central journal article supplement (PMC9214631)
Supplement: jamapediatr-e221973-s003.pdf [file jamapediatr-e221973-s003.pdf]

Supplemental Online Content: Nonauthor Collaborators

\*First name, last name, and suffix (if applicable) are required and will appear in PubMed.

| <b>*Group Name(s): the Multispecies Probiotic in AAD Study Group</b> |                   |                              |                  |                     |                                           |                                                                                                              |                                                                                            |
|----------------------------------------------------------------------|-------------------|------------------------------|------------------|---------------------|-------------------------------------------|--------------------------------------------------------------------------------------------------------------|--------------------------------------------------------------------------------------------|
| <b>*First Name and Middle Initial(s)</b>                             | <b>*Last Name</b> | <b>*Suffix (eg, Jr, III)</b> | Academic Degrees | Institution         | Location (city, state/province, country)  | Role or Contribution, eg, chair, principal investigator                                                      | Group (if more than 1 Group listed in the byline) and/or Subgroup (eg, Steering Committee) |
| Sophie R. D.                                                         | van der Schoor    |                              | MD, PhD          | OLVG Hospital       | Amsterdam, Noord-Holland, The Netherlands | Helped with recruitment of participant in the OLVG hospital                                                  |                                                                                            |
| Malika                                                               | Chegary           |                              | MD, PhD          | OLVG Hospital       | Amsterdam, Noord-Holland, The Netherlands | Helped with recruitment of participant in the OLVG hospital                                                  |                                                                                            |
| Catharina (Karen) J.M.                                               | Koning            |                              | PhD              | Winclove Probiotics | Amsterdam, Noord-Holland, The Netherlands | contributed in design and setup of the study, as well as on co-reading/giving input on the final manuscript. |                                                                                            |
