# Supplementary material
Source: PubMed Central journal article supplement (PMC9214631)
Supplement: jamapediatr-e221973-s004.pdf [file jamapediatr-e221973-s004.pdf]

## Data Sharing Statement

Łukasik. Multispecies Probiotic for the Prevention of Antibiotic-Associated Diarrhea in Children. *JAMA Pediatr*. Published June 21, 2022. doi:10.1001/jamapediatrics.2022.1973

### Data

**Data available:** Yes

**Data types:** Deidentified participant data

**How to access data:** The data collected in the course of this study are available from the corresponding author upon reasonable request.

**When available:** With publication

### Supporting Documents

**Document types:** None

### Additional Information

**Who can access the data:** The data will be available to the researchers whose proposed use of the data has been approved

**Types of analyses:** The data will be available for any purpose,

**Mechanisms of data availability:** The data will be made available with investigator support.
